# Supplementary material for: Promoting the effects of CuSO4 on N2 selectivity in selective catalytic oxidation of ammonia over Pt/TiO2 catalysts
Source: Royal Society of Chemistry journal article supplement (doi:10.1039/d2nj04037a), 2022-01-01
Supplement: d2nj04037a1.pdf [file d2nj04037a1.pdf]

## Support Information

### **Promoting effects of CuSO<sub>4</sub> on N<sub>2</sub> selectivity in selective catalytic oxidation of ammonia over Pt/TiO<sub>2</sub> catalysts**

Yanke Yu<sup>a</sup>, Mengqiao Geng<sup>a</sup>, Desheng Wei<sup>a</sup>, Chi He<sup>\*a, b</sup>

<sup>a</sup> *Department of Environmental Science and Engineering, School of Energy and Power Engineering, Xi'an Jiaotong University, Xi'an 710049, P.R. China. E-mail: chi\_he@xjtu.edu.cn*

<sup>b</sup> *National Engineering Laboratory for VOCs Pollution Control Material & Technology, University of Chinese Academy of Sciences, Beijing 101408, P.R. China.*

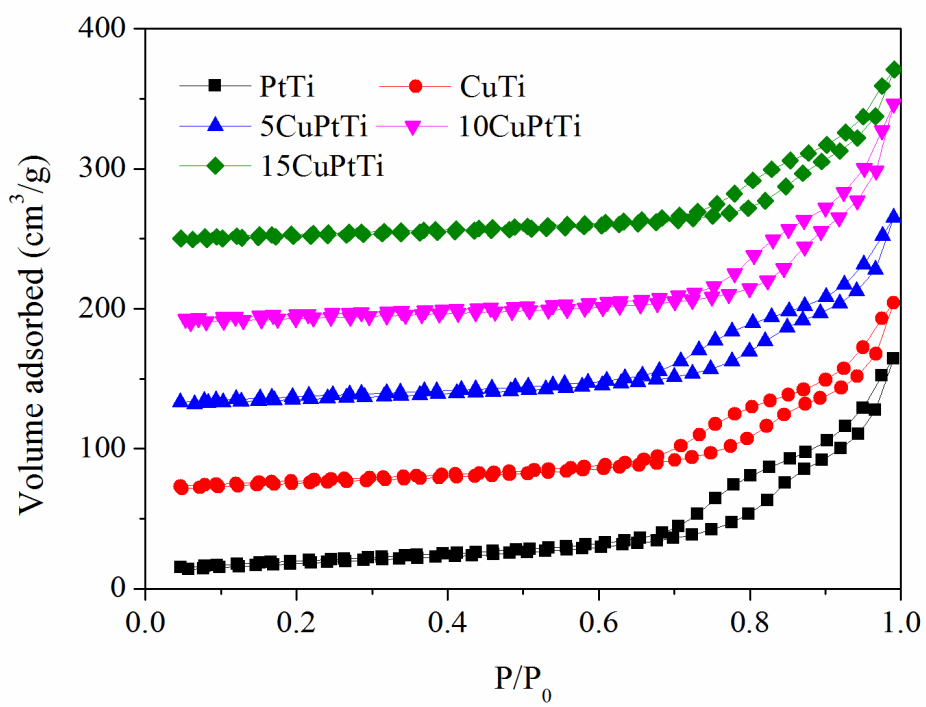

Figure S1. N<sub>2</sub> adsorption-desorption isotherm of each sample.

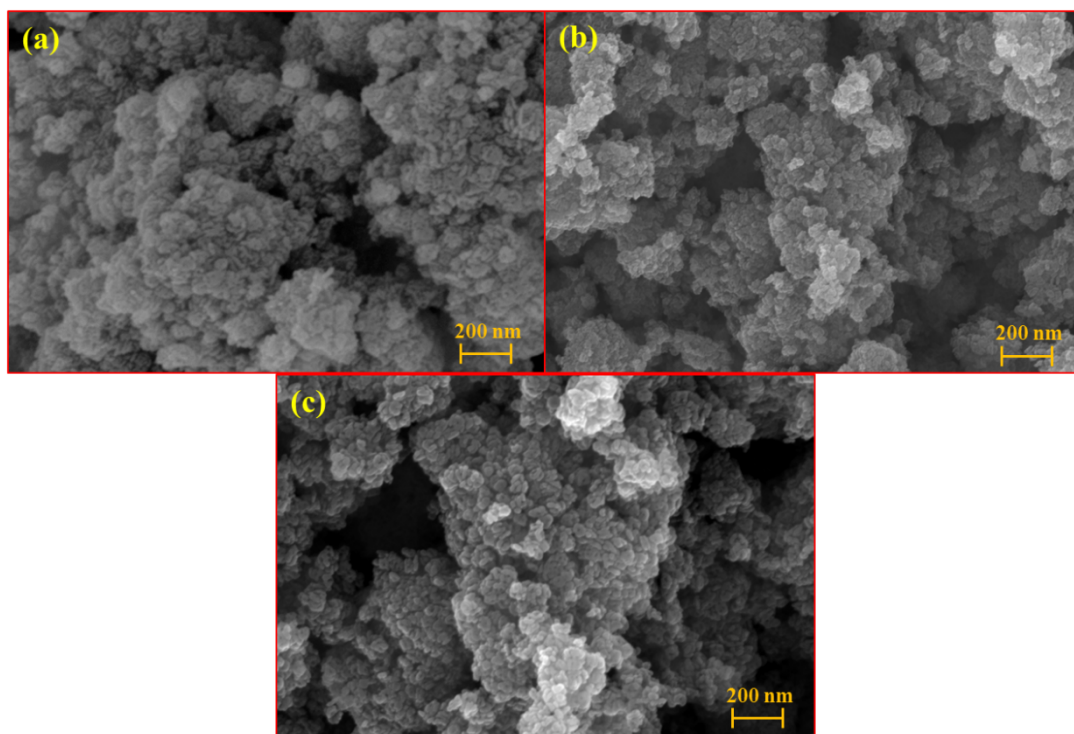

Figure S2. SEM photo of (a) PtTi, (b) CuTi and (c) 10CuPtTi sample.

**Table S1** Performance of reported Pt-based catalysts in NH<sub>3</sub>-SCO reaction

| Catalyst                                                   | Tested conditions                                                                                     | T <sub>100</sub> (°C) | N <sub>2</sub> selectivity (%) | Reference |
|------------------------------------------------------------|-------------------------------------------------------------------------------------------------------|-----------------------|--------------------------------|-----------|
| Pt/Al <sub>2</sub> O <sub>3</sub>                          | 200 ppm NH <sub>3</sub> , 8% O <sub>2</sub> ,<br>GHSV = 100 000 h <sup>-1</sup> .                     | 300                   | 30                             | 1         |
| Pt/CeZrO <sub>2</sub>                                      | Same as above conditions                                                                              | 325                   | 42                             | 1         |
| Pt/Al <sub>2</sub> O <sub>3</sub> (H <sub>2</sub> reduced) | 1000 ppm NH <sub>3</sub> , 4% O <sub>2</sub> ,<br>GHSV = 120 000 h <sup>-1</sup>                      | 220                   | 63                             | 2         |
| Pt/SiO <sub>2</sub> -Al <sub>2</sub> O <sub>3</sub>        | 200 ppm NH <sub>3</sub> , 10% O <sub>2</sub> , 5%<br>H <sub>2</sub> O, GHSV = 100 000 h <sup>-1</sup> | 238                   | 50                             | 3         |
| Pt/SiAl-E                                                  | Same as above                                                                                         | 240                   | 63                             | 4         |
| PtCu/ZSM-5                                                 | 180 ppm NH <sub>3</sub> , 8% O <sub>2</sub> ,<br>GHSV = 100 000 h <sup>-1</sup>                       | 275                   | 72                             | 5         |
| FeZ(1.5)Pt(3)                                              | 500 ppm NH <sub>3</sub> , 5% O <sub>2</sub> ,<br>GHSV = 66 000 h <sup>-1</sup>                        | 300                   | 72                             | 6         |
| Pt-WO <sub>3</sub> /ZrO <sub>2</sub>                       | 180 ppm NH <sub>3</sub> , 8% O <sub>2</sub> ,<br>GHSV = 100 000 h <sup>-1</sup> .                     | 300                   | 58                             | 7         |
| Pt/TiO <sub>2</sub>                                        | 2000 ppm NH <sub>3</sub> , 8% O <sub>2</sub> ,<br>GHSV = 60 000 h <sup>-1</sup>                       | 275                   | 48                             | 8         |
| Pt/Al <sub>2</sub> O <sub>3</sub>                          | 500 ppm NH <sub>3</sub> , 5% O <sub>2</sub> ,<br>GHSV = 66 000 h <sup>-1</sup>                        | 250                   | 50                             | 9         |
| Pt-CuSO <sub>4</sub> /TiO <sub>2</sub>                     | 500 ppm NH <sub>3</sub> , 4% O <sub>2</sub> ,<br>GHSV = 60 000 h <sup>-1</sup>                        | 250                   | 78                             | This work |

## References

1. M. Sun, J. Liu, C. Song, Y. Ogata, H. Rao, X. Zhao, H. Xu and Y. Chen, ACS Appl. Mater. Inter., 2019, 11, 23102-23111.
2. D. A. Svintsitskiy, E. M. Slavinskaya, O. A. Stonkus, A. V. Romanenko, A. I. Stadnichenko, L. S. Kibis, E. A. Derevyannikova, A. A. Evtushkova and A. I. Boronin, J. Struct. Chem., 2019, 60, 919-931.
3. J. Liu, Q. Lin, S. Liu, S. Xu, H. Xu and Y. Chen, New J. Chem., 2020, 44, 4108-4113.
4. J. Liu, M. Sun, Q. Lin, S. Liu, H. Xu and Y. Chen, Appl. Surf. Sci., 2019, 481, 1344-1351.
5. M. Sun, S. Wang, Y. Li, Q. Wang, H. Xu and Y. Chen, J. Taiwan Inst. Chem. Eng., 2017, 78, 401-408.
6. S. Shrestha, M. P. Harold, K. Kamasamudram and A. Yezerets, Catal. Today, 2014, 231, 105-115.
7. M. Sun, S. Wang, Y. Li, H. Xu and Y. Chen, Appl. Surf. Sci., 2017, 402, 323-329.
8. G. J. Kim, D. W. Kwon, J. H. Shin, K. W. Kim and H. S. Chang, Environ. Technol. 2019, 40, 2588-2600.
9. S. Shrestha, M.P. Harold, K. Kamasamudram and A. Yezerets, Catal. Today 2014, 231, 105-115.

**Table S2** The concentration of Pt and Cu in each sample (wt.%)

| Sample   | Pt   | Cu   |
|----------|------|------|
| PtTi     | 0.48 | -    |
| 10CuTi   | -    | 3.91 |
| 10CuPtTi | 0.47 | 3.89 |
